# Supplementary material for: Cadmium Uptake, MT Gene Activation and Structure of Large-Sized Multi-Domain Metallothioneins in the Terrestrial Door Snail Alinda biplicata (Gastropoda, Clausiliidae)
Source: MDPI journal article supplement (doi:10.3390/ijms21051631), 2020-02-27

**Figure S1:** Documented feeding behaviour of controls (A) and snails exposed to increased concentrations of Cadmium (B - Cd1[38 $\mu$ g/g Cd]; C - Cd10[355.3 $\mu$ g/gCd]; D - Cd25[804.5 $\mu$ g/gCd]; E – Cd100[2692.6 $\mu$ g/gCd]; F – Cd200[6396.1 $\mu$ g/gCd]). Per treatment group two petridishes with five individuals each were used.

### A - Controls

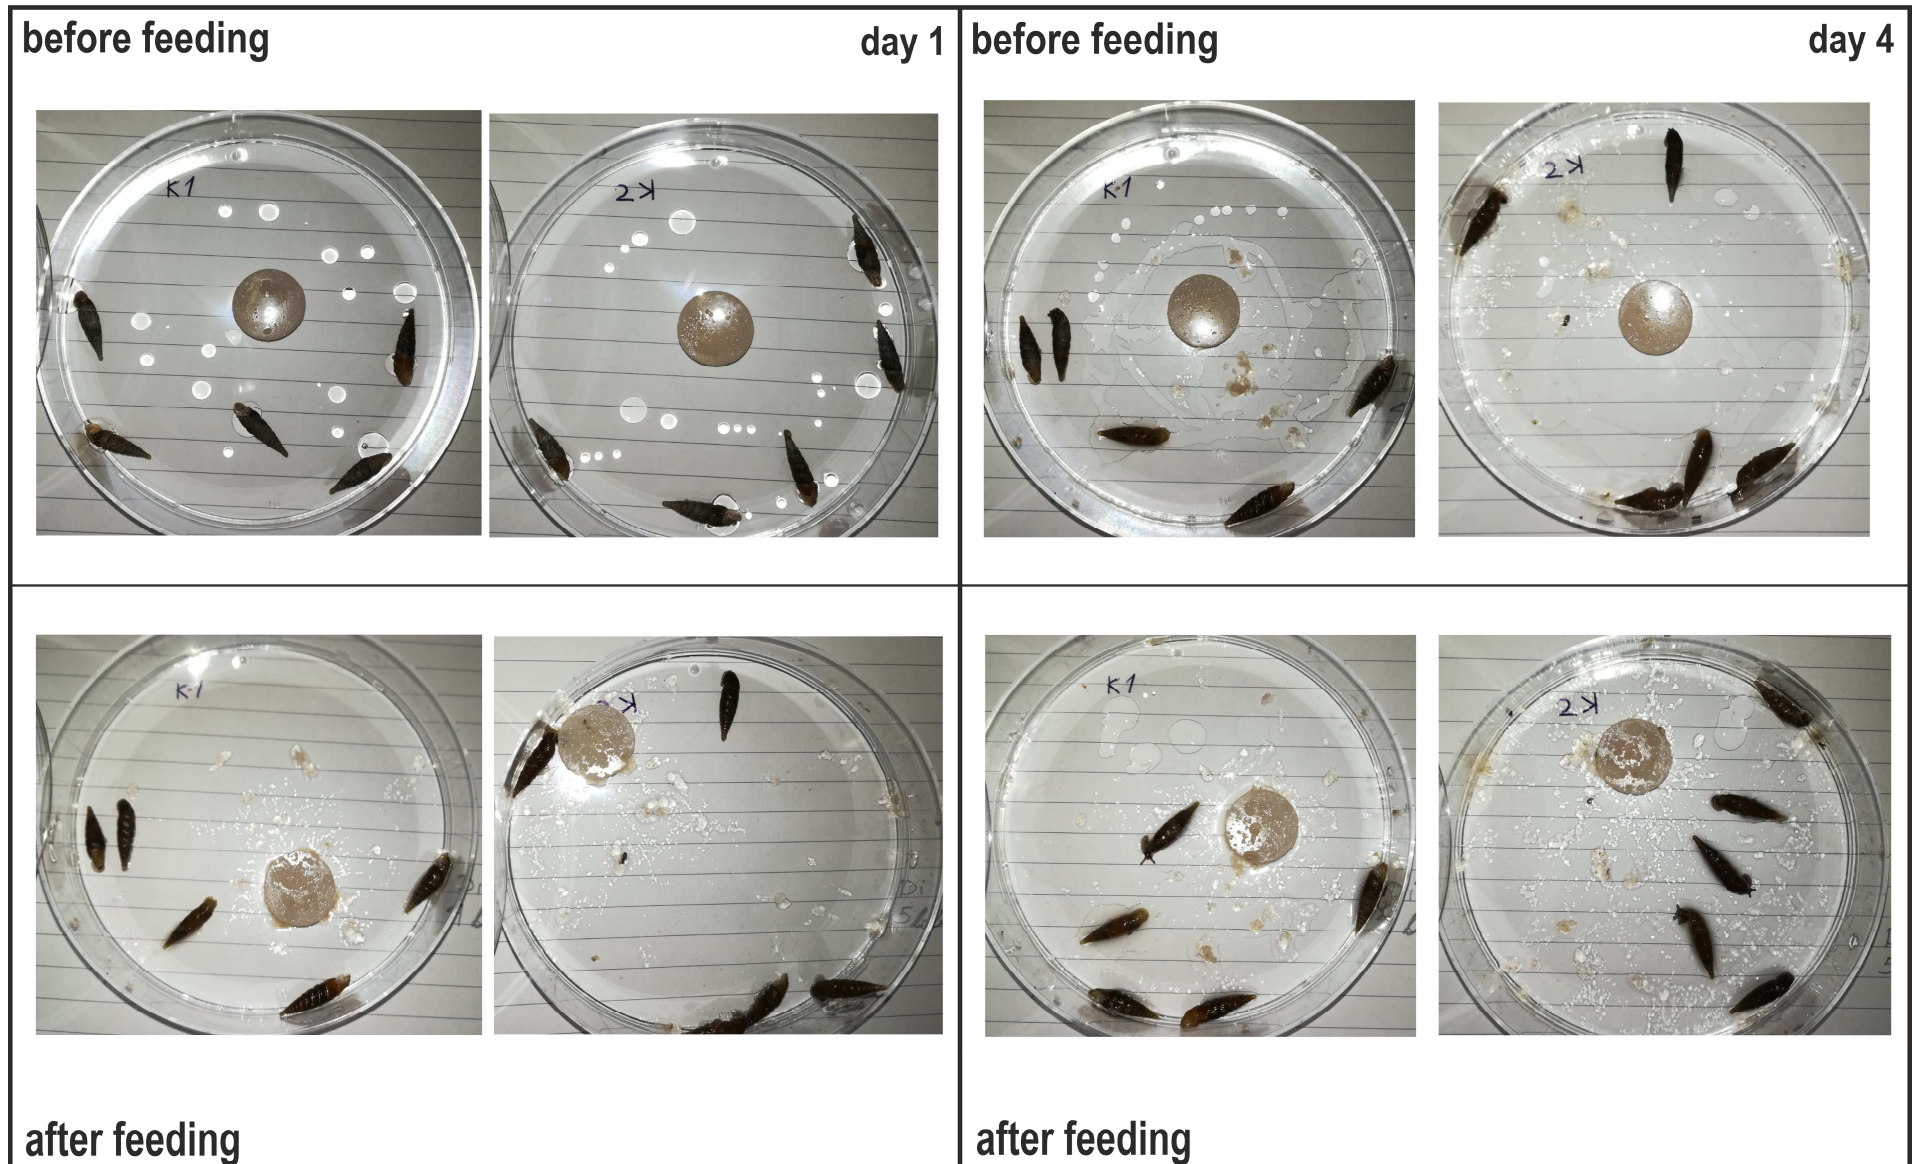

B - Cd1

before feeding

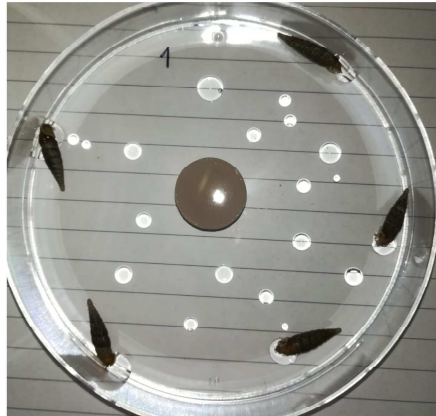

day 1

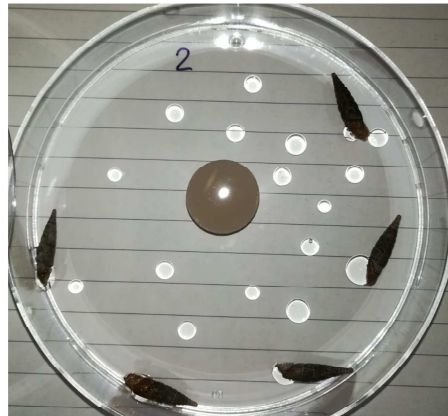

before feeding

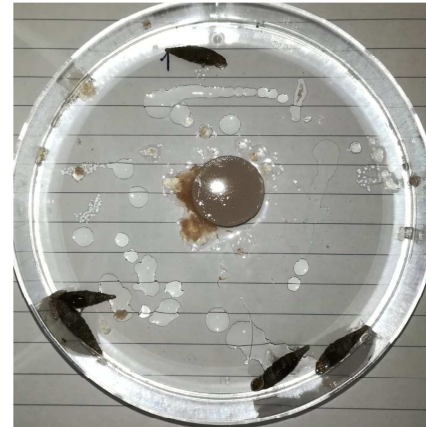

day 4

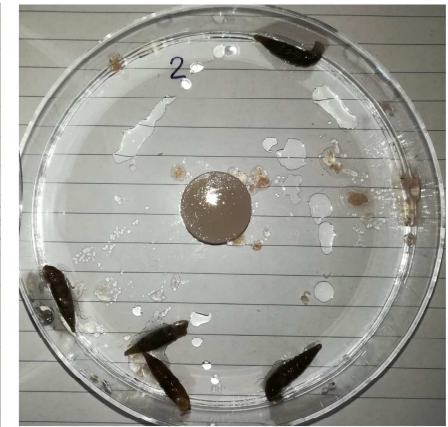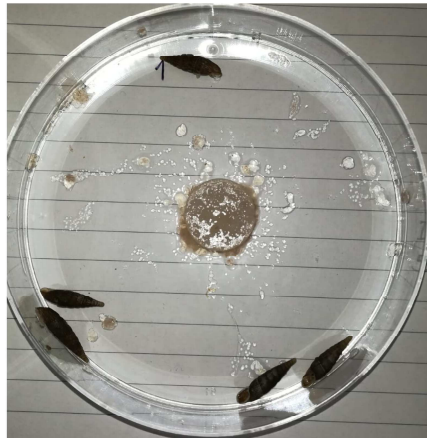

after feeding

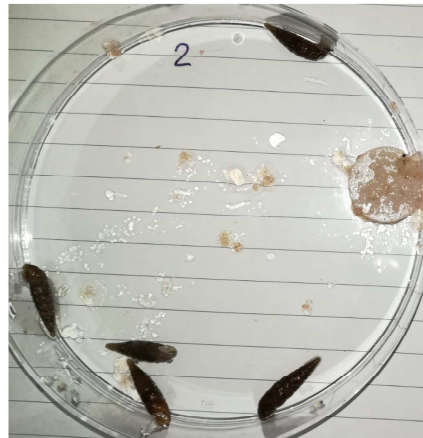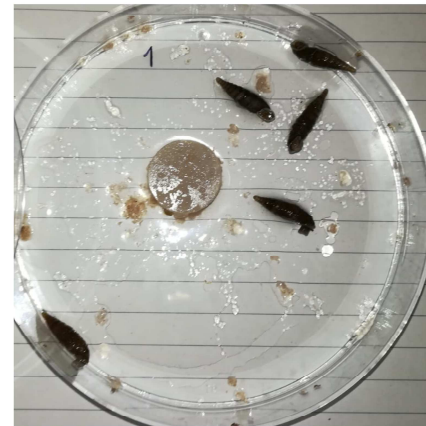

after feeding

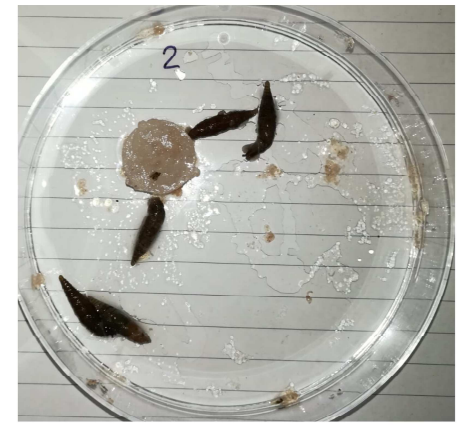

C - Cd10

before feeding

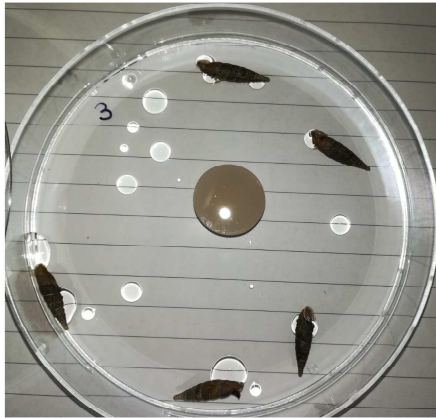

day 1

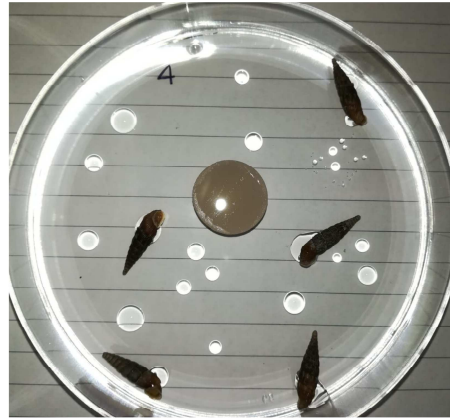

before feeding

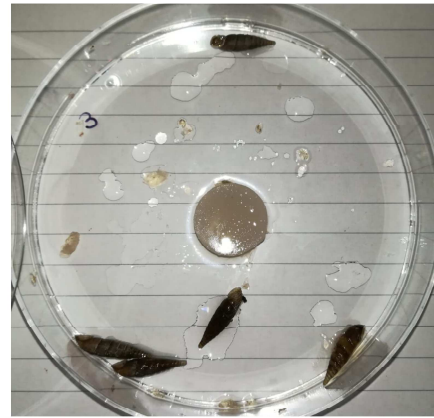

day 4

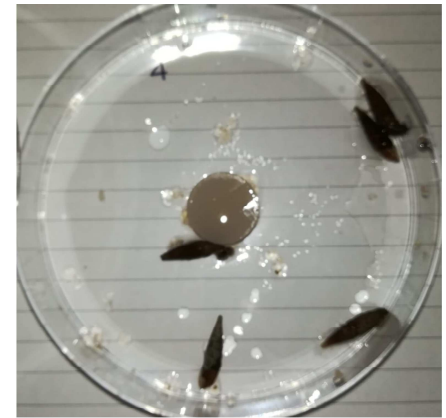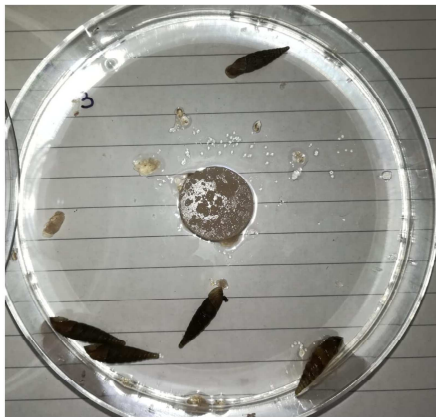

after feeding

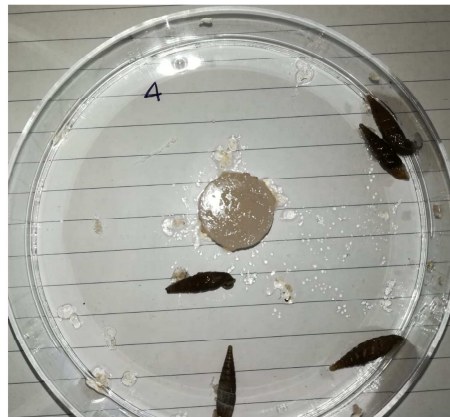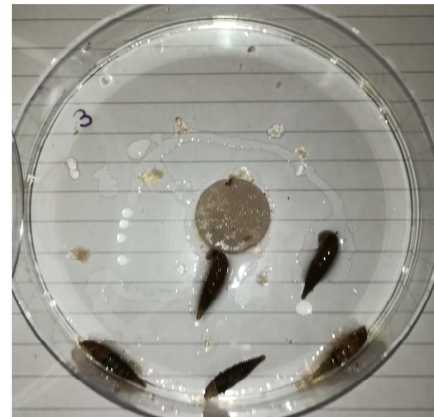

after feeding

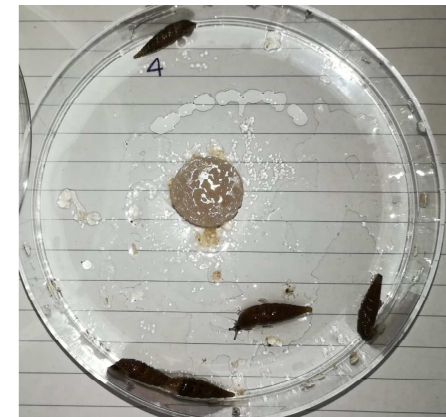

D - Cd25

before feeding

day 1

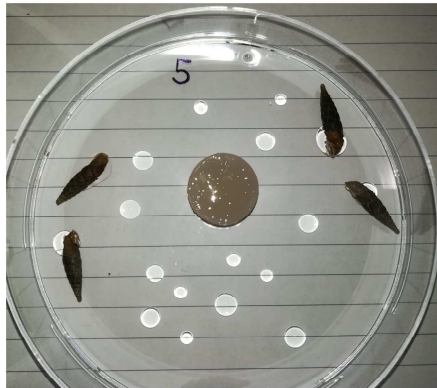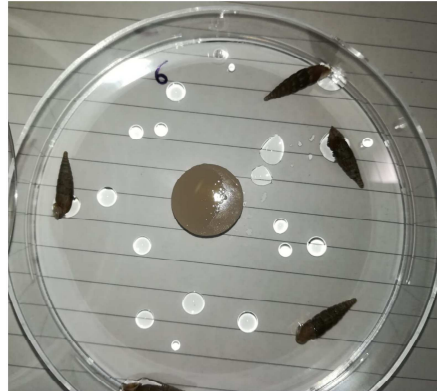

before feeding

day 4

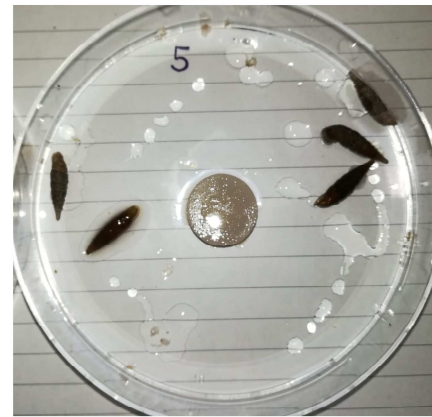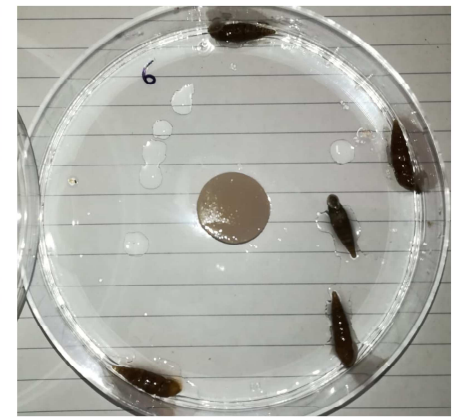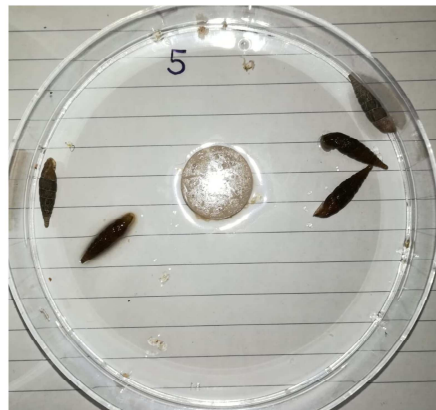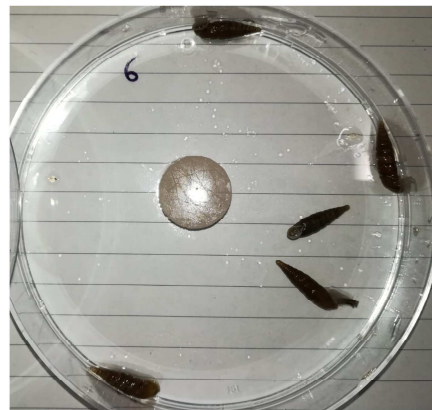

after feeding

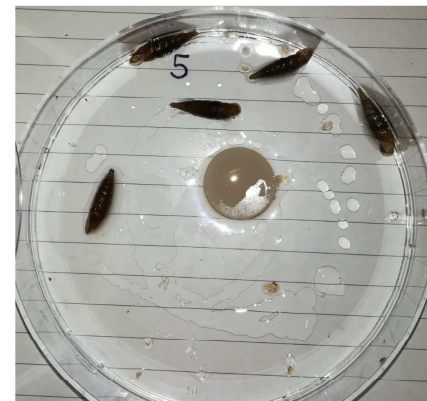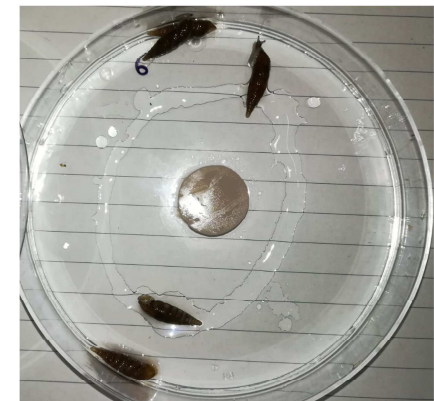

after feeding

E - Cd100

before feeding

day 1

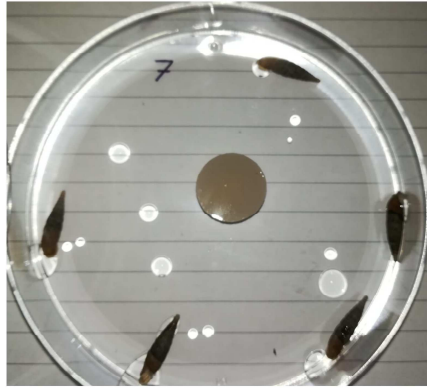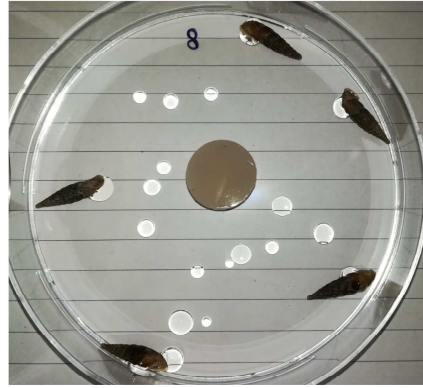

before feeding

day 4

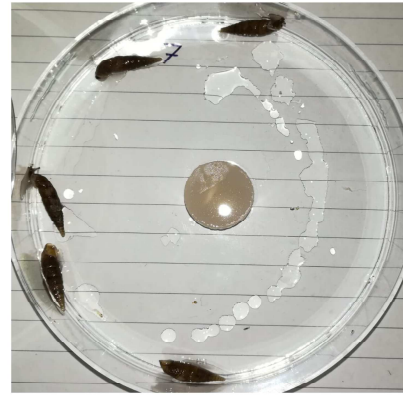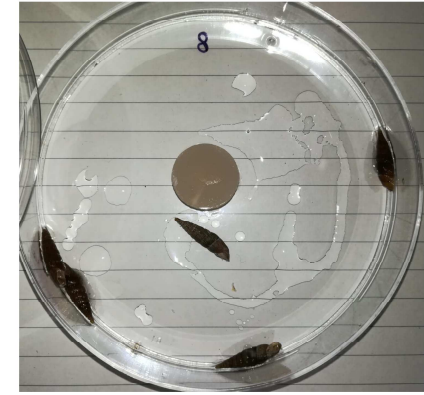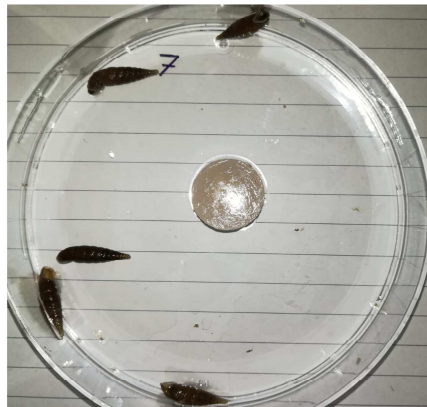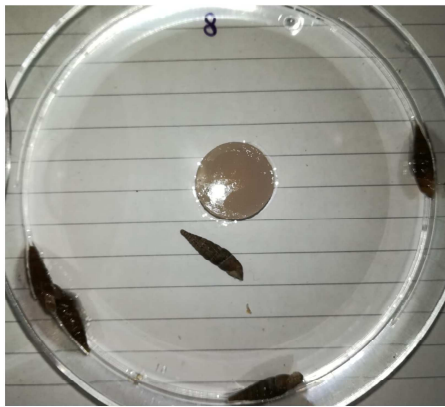

after feeding

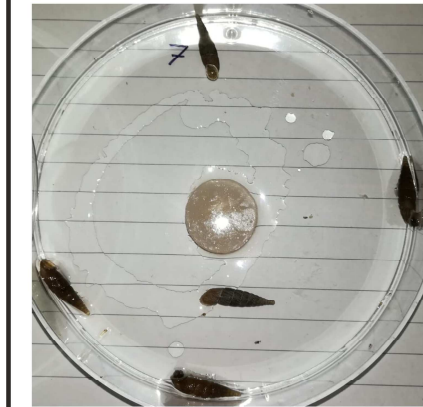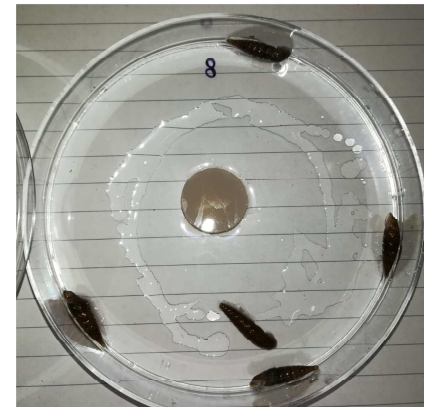

after feeding

F - Cd200

before feeding

day 1

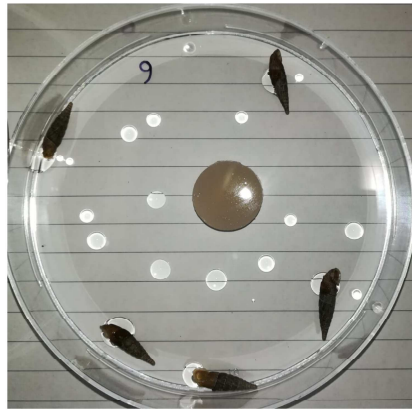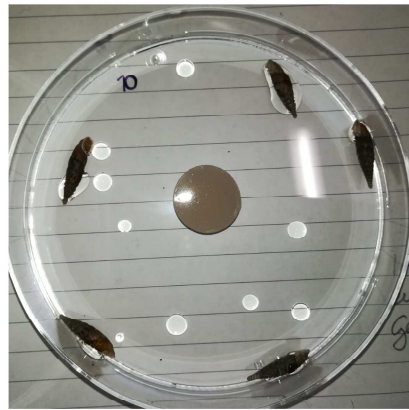

before feeding

day 4

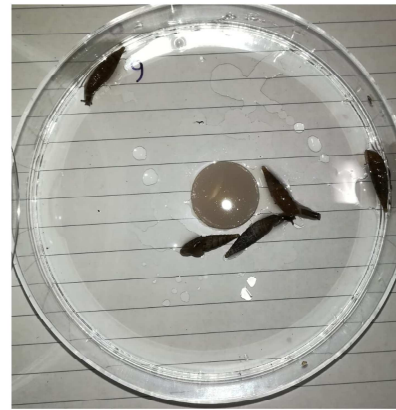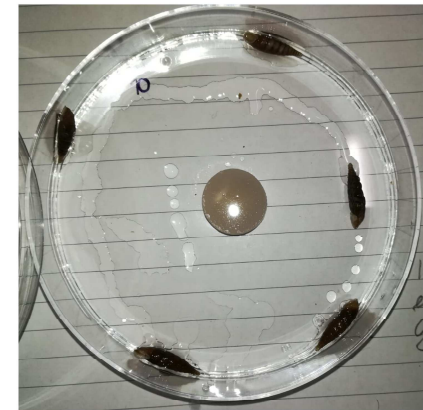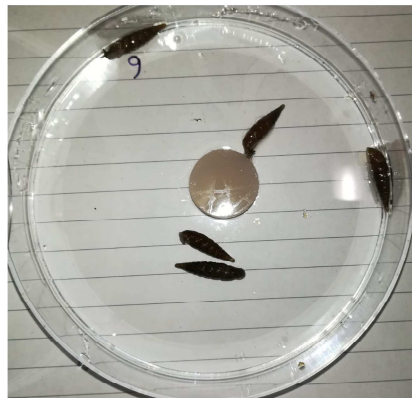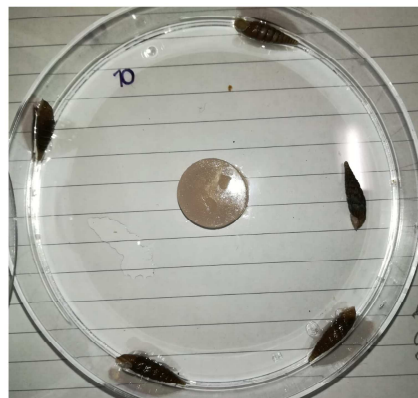

after feeding

after feeding

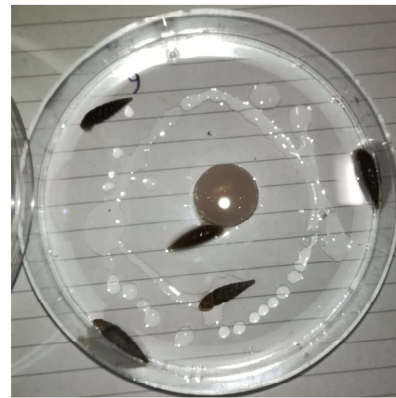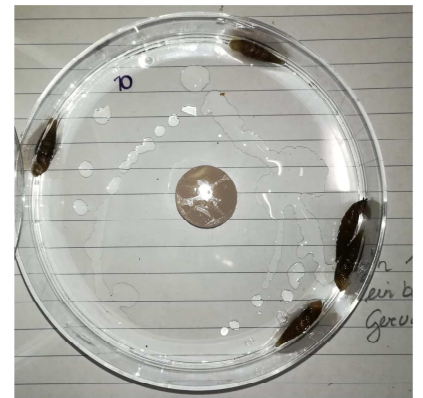

Supplement: s1 [file s1]
